# Supplementary material for: In situ construction of a stable interface induced by the SnS2 ultra-thin layer for dendrite restriction in a solid-state sodium metal battery
Source: Royal Society of Chemistry journal article supplement (doi:10.1039/d1ta04869d), 2021-01-01
Supplement: d1ta04869d1.pdf [file d1ta04869d1.pdf]

## Supporting Information

In-situ construction of stable interface induced by SnS<sub>2</sub> ultra-thin layer  
for dendrite restriction in solid-state sodium metal battery

Xinxin Wang<sup>a</sup>, Jingjing Chen<sup>b</sup>, Zhiyong Mao<sup>a\*</sup> and Dajian Wang<sup>b\*</sup>

<sup>a</sup> Tianjin Key Laboratory for Photoelectric Materials and Devices, Tianjin University of  
Technology, Tianjin, 300384, China.

<sup>b</sup> Key Laboratory of Display Materials and Photoelectric Devices, Tianjin University of  
Technology, Tianjin, 300384, China.

**\*Corresponding author Email:** [mzhy1984@163.com](mailto:mzhy1984@163.com); [djwang@tjut.edu.cn](mailto:djwang@tjut.edu.cn)

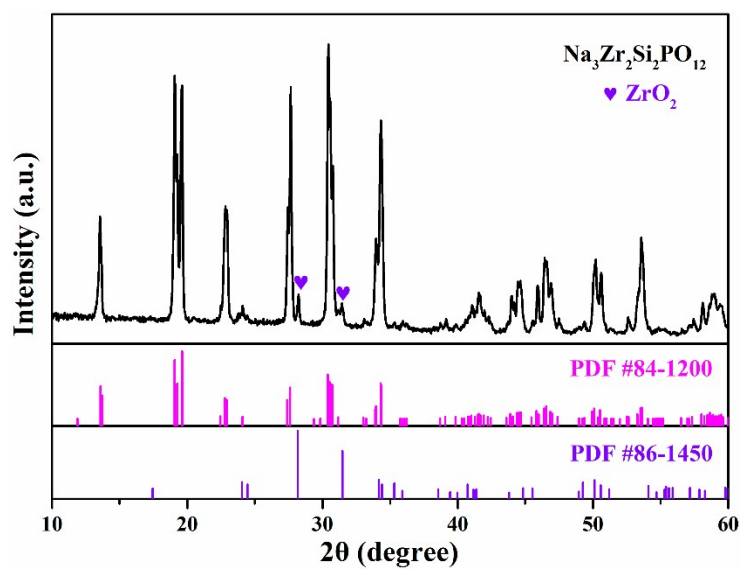

Figure S1. XRD diffraction pattern of Na<sub>3</sub>Zr<sub>2</sub>Si<sub>2</sub>PO<sub>12</sub>.

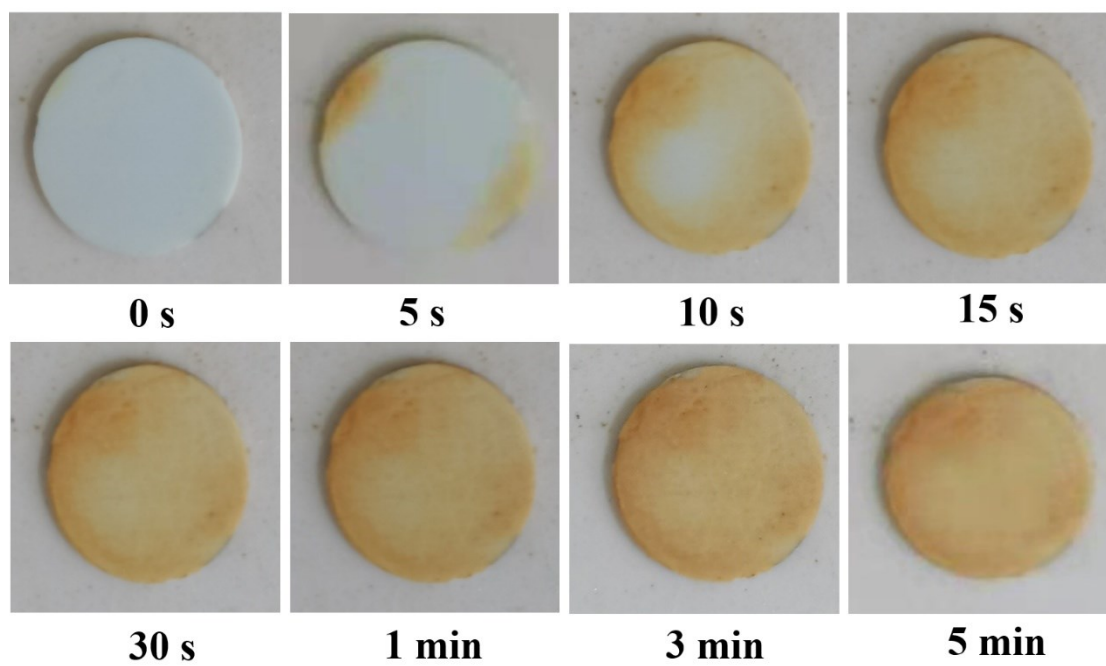

Figure S2. Digital photos of SnS<sub>2</sub>-Na<sub>3</sub>Zr<sub>2</sub>Si<sub>2</sub>PO<sub>12</sub> prepared by pyrolysis method.

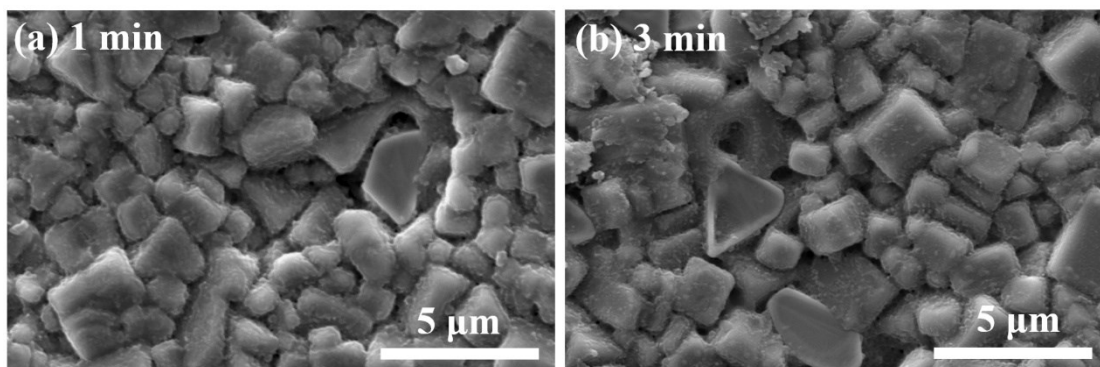

**Figure S3.** Top SEM views of  $\text{SnS}_2\text{-Na}_3\text{Zr}_2\text{Si}_2\text{PO}_{12}$  pellet at different calcination time.

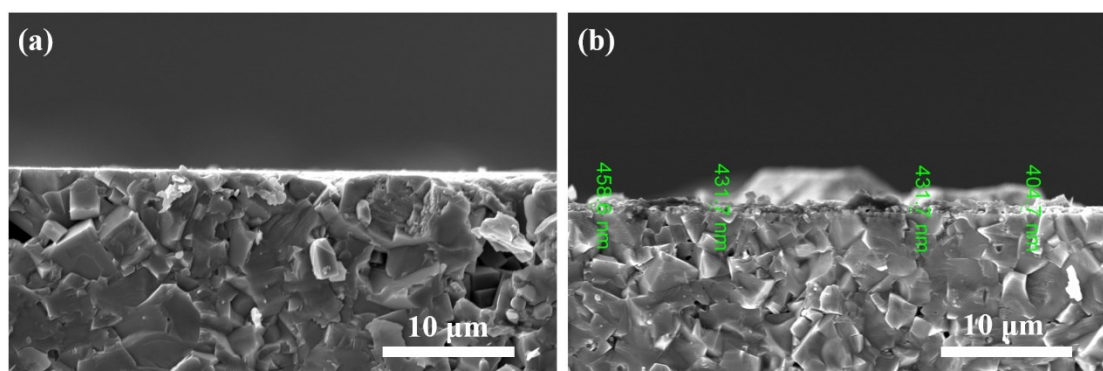

**Figure S4.** SEM images of the cross-sections of (a) polished  $\text{Na}_3\text{Zr}_2\text{Si}_2\text{PO}_{12}$  pellet and (b)  $\text{SnS}_2$ -polished  $\text{Na}_3\text{Zr}_2\text{Si}_2\text{PO}_{12}$  pellet.

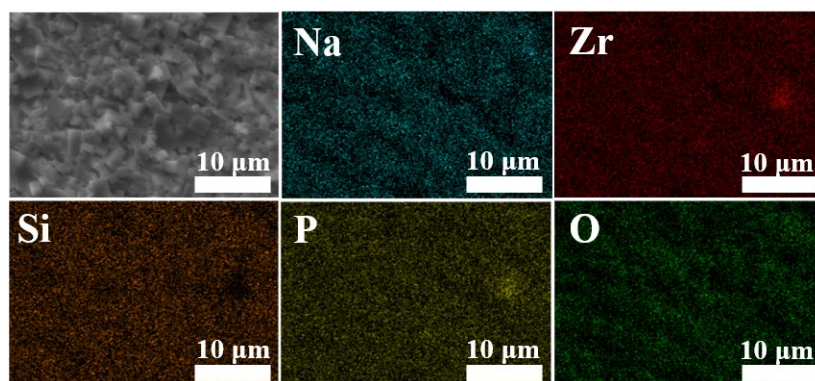

**Figure S5.** SEM image and EDX elemental mappings of the top view of  $\text{Na}_3\text{Zr}_2\text{Si}_2\text{PO}_{12}$  pellet.

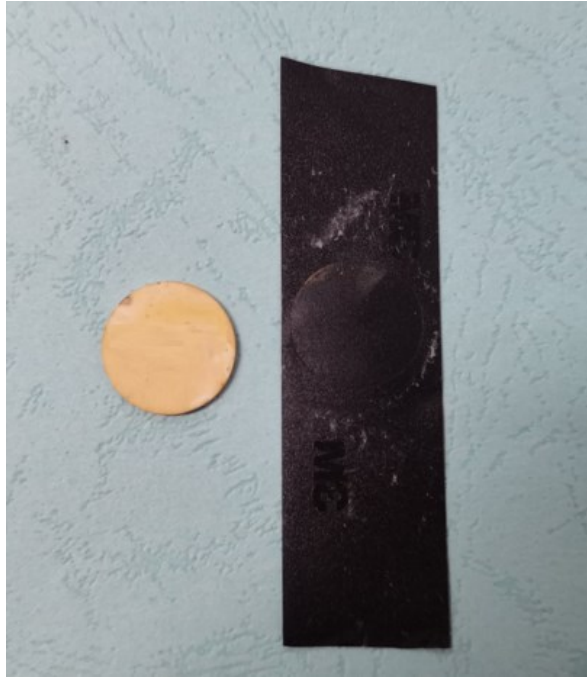

**Figure S6.** Digital photos of  $\text{SnS}_2\text{-Na}_3\text{Zr}_2\text{Si}_2\text{PO}_{12}$  after adhesive tape tearing.

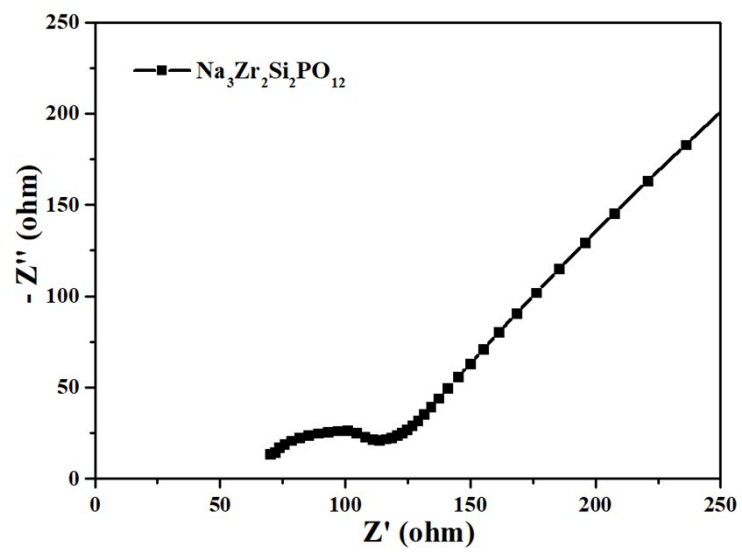

**Figure S7.** Nyquist plots of impedance for  $\text{Na}_3\text{Zr}_2\text{Si}_2\text{PO}_{12}$ .

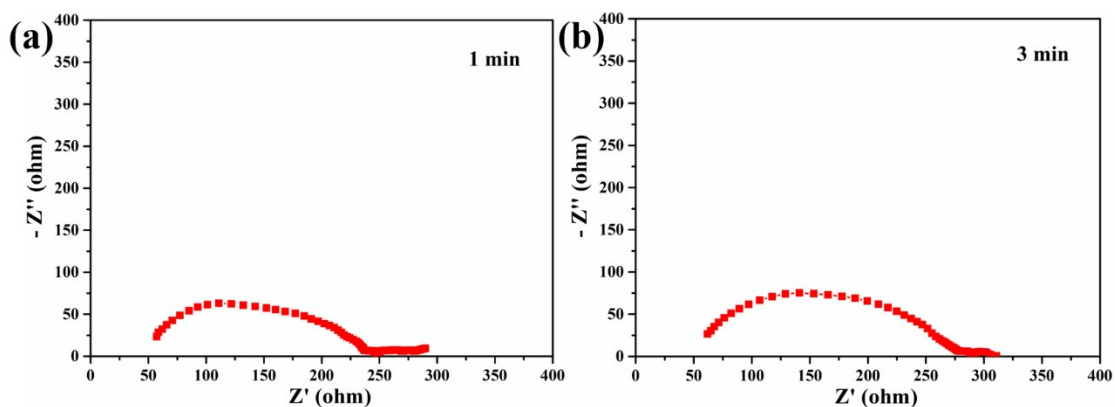

**Figure S8.** The electrochemical impedance spectra for the assembled Na symmetrical cells with  $\text{SnS}_2\text{-Na}_3\text{Zr}_2\text{Si}_2\text{PO}_{12}$  pellet prepared by different calcination time.

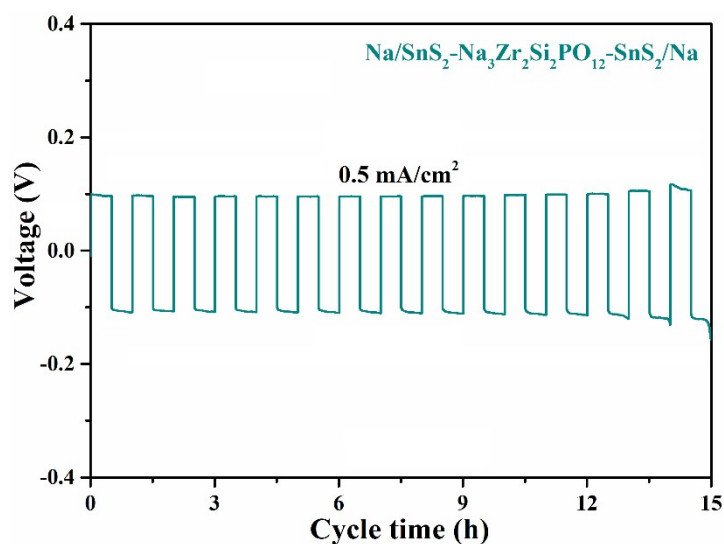

**Figure S9.** Galvanostatic cycling curve of  $\text{Na/SnS}_2\text{-Na}_3\text{Zr}_2\text{Si}_2\text{PO}_{12}\text{-SnS}_2/\text{Na}$  symmetrical cell at current density of  $0.5 \text{ mA cm}^{-2}$  at RT.

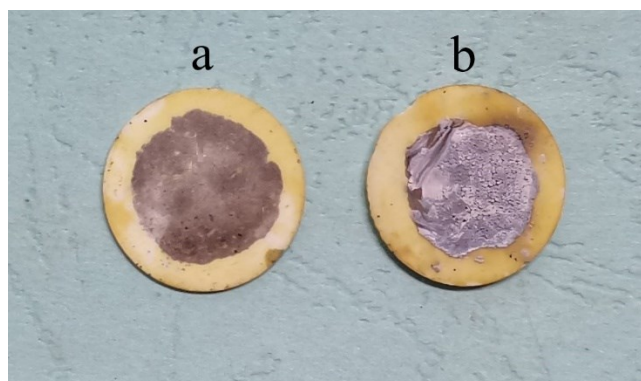

**Figure S10.** Digital photos of  $\text{SnS}_2\text{-Na}_3\text{Zr}_2\text{Si}_2\text{PO}_{12}$  pellet after cycled at  $0.5 \text{ mA cm}^{-2}$  for 15h at RT. a) washed by ethanol; b) with oxidized Sodium metal.

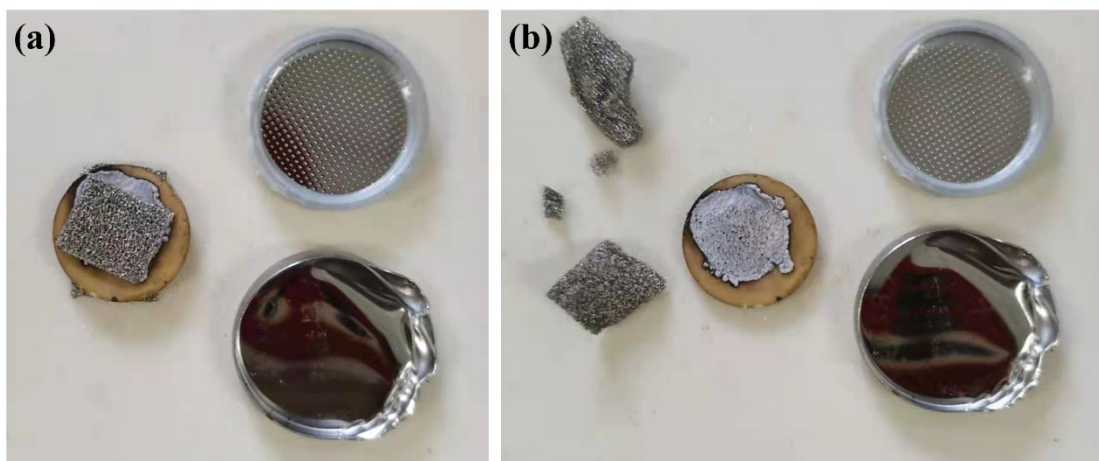

**Figure S11.** Digital photos of recovered  $\text{SnS}_2\text{-Na}_3\text{Zr}_2\text{Si}_2\text{PO}_{12}$  pellet after cycled. The sodium foil was tightly bonded with the electrolyte sheet, and the metallic sodium cannot be peeled off even if the foamed nickels were torn off.

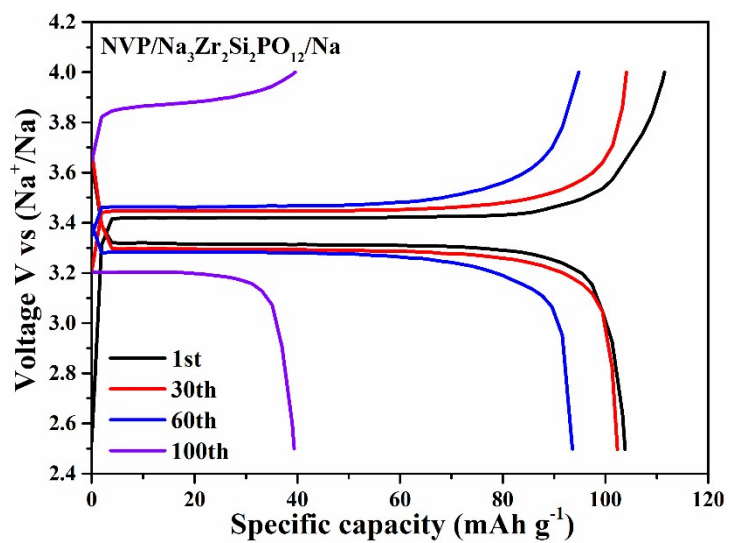

**Figure S12.** Typical charge/discharge curves of the assembled  $\text{Na}_3\text{V}_2(\text{PO}_4)_3|\text{Na}_3\text{Zr}_2\text{Si}_2\text{PO}_{12}|\text{Na}$  cell at 1C.



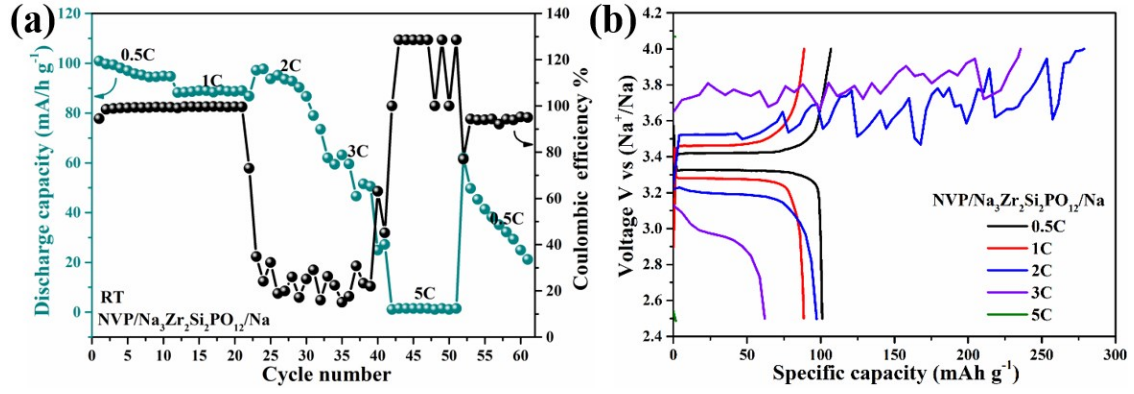

**Figure S13.** (a) The rate performance of the assembled  $\text{Na}_3\text{V}_2(\text{PO}_4)_3|\text{Na}_3\text{Zr}_2\text{Si}_2\text{PO}_{12}|\text{Na}$  cell at various current densities at RT. (b) Typical charge/discharge curves at various current densities.

**Table S1.** Comparison on electrochemical performances between our work and recent publications.

| Interfacial modification                                                          | Symmetrical cell impedance ( $\Omega \cdot \text{cm}^2$ ) | Critical current density ( $\text{mA cm}^{-2}/^\circ\text{C}$ ) | Stability ( $\text{mA cm}^{-2}/\text{h}/^\circ\text{C}$ ) | Ref |
|-----------------------------------------------------------------------------------|-----------------------------------------------------------|-----------------------------------------------------------------|-----------------------------------------------------------|-----|
| 380°C molten Na/SPS synthesized $\text{Na}_3\text{Zr}_2\text{Si}_2\text{PO}_{12}$ | 400                                                       | 0.15/65                                                         | 0.15/335/65°C                                             | 1   |
| Na-SiO <sub>2</sub> / $\text{Na}_3\text{Zr}_2\text{Si}_2\text{PO}_{12}$           | 400                                                       | 0.5/RT                                                          | 0.1-0.2/135/25°C                                          | 2   |
| Na/AlF <sub>3</sub> - $\text{Na}_3\text{Zr}_2\text{Si}_2\text{PO}_{12}$           | 3600                                                      | 1.0/RT, 1.2/60                                                  | 0.15-0.25/300/60°C                                        | 3   |
| Na/TiO <sub>2</sub> - $\text{Na}_3\text{Zr}_2\text{Si}_2\text{PO}_{12}$           | 350                                                       | N/A                                                             | 0.2/750/25°C                                              | 4   |
| Na/trilayer-0.1Ca- $\text{Na}_3\text{Zr}_2\text{Si}_2\text{PO}_{12}$              | 175                                                       | N/A                                                             | 0.1-0.3/600/RT                                            | 5   |
| Na/SPAN- $\text{Na}_3\text{Zr}_2\text{Si}_2\text{PO}_{12}$                        | 200                                                       | 1.4/RT                                                          | 0.15-0.25/500/RT                                          | 6   |
| Na/HT- $\text{Na}_3\text{Zr}_2\text{Si}_2\text{PO}_{12}$                          | 680                                                       | N/A                                                             | 0.1/1500/25°C                                             | 7   |
| Na/ $\text{Na}_3\text{Zr}_2\text{Si}_2\text{PO}_{12}$                             | 260                                                       | 0.2/RT                                                          | 0.1/800/RT                                                | 8   |

|                                                                                       |     |        |                                                       |           |
|---------------------------------------------------------------------------------------|-----|--------|-------------------------------------------------------|-----------|
| Na/SnS <sub>2</sub> -Na <sub>3</sub> Zr <sub>2</sub> Si <sub>2</sub> PO <sub>12</sub> | 280 | 0.9/RT | 0.1/800/RT<br>0.25/600/RT<br>0.3/400/RT<br>0.4/100/RT | This work |
|---------------------------------------------------------------------------------------|-----|--------|-------------------------------------------------------|-----------|

**Table S2.** Comparison on cycling performances between our work and recent publications.

| Battery configuration                                                                                                 | Capacity retention ratios   | Rate performance            | Ref       |
|-----------------------------------------------------------------------------------------------------------------------|-----------------------------|-----------------------------|-----------|
| NVP-LE/Na <sub>3</sub> Zr <sub>2</sub> Si <sub>2</sub> PO <sub>12</sub> -AlF <sub>3</sub> /Na                         | 1C/83.4% after 100 cycles   | N/A                         | 3         |
| NVP-LE/Na <sub>3</sub> Zr <sub>2</sub> Si <sub>2</sub> PO <sub>12</sub> -TiO <sub>2</sub> /Na                         | 0.1C/70.6% after 60 cycles  | N/A                         | 4         |
| (NVP/SCN/PEO/NaClO <sub>4</sub> )/0.1Ca-Na <sub>3</sub> Zr <sub>2</sub> Si <sub>2</sub> PO <sub>12</sub> -trilayer/Na | 1C/98.13% after 450 cycles  | 4C/80.5 mAh·g <sup>-1</sup> | 5         |
| (NVP/NaFSI/PP <sub>13</sub> FSI)/Na <sub>3</sub> Zr <sub>2</sub> Si <sub>2</sub> P<br>O <sub>12</sub> /Na             | 0.1C/91.3% after 120 cycles | 1C/50 mAh·g <sup>-1</sup>   | 8         |
| NVP-LE/Na <sub>3</sub> Zr <sub>2</sub> Si <sub>2</sub> PO <sub>12</sub> -SPAN/Na                                      | 0.5C/87.5% after 200 cycles | 2C/81.1 mAh·g <sup>-1</sup> | 6         |
| NVP-LE/ Na <sub>3</sub> Zr <sub>2</sub> Si <sub>2</sub> PO <sub>12</sub> -SnS <sub>2</sub> /Na                        | 1C/96.7% after 100 cycles   | 5C/86.1 mAh·g <sup>-1</sup> | This work |

## References

1. W. Zhou, Y. Li, S. Xin and J. B. Goodenough, *ACS Central Science*, 2017, **3**, 52-57.
2. H. Fu, Q. Yin, Y. Huang, H. Sun, Y. Chen, R. Zhang, Q. Yu, L. Gu, J. Duan and W. Luo, *ACS Materials Letters*, 2020, **2**, 127-132.
3. X. Miao, H. Di, X. Ge, D. Zhao, P. Wang, R. Wang, C. Wang and L. Yin, *Energy Storage Materials*, 2020, **30**, 170-178.
4. J. Y. Yang, Z. H. Gao, T. Ferber, H. F. Zhang, C. Guhl, L. T. Yang, Y. Y. Li, Z. Deng, P. R. Liu, C. W. Cheng, R. C. Che, W. Jaegermann, R. Hausbrand and Y. H. Huang, *Journal of Materials Chemistry A*, 2020, **8**, 7828-7835.
5. Y. Lu, J. A. Alonso, Q. Yi, L. Lu, Z. L. Wang and C. W. Sun, *Advanced Energy Materials*, 2019, **9**, 9.
6. X. G. Miao, H. Y. Wang, R. Sun, X. L. Ge, D. Y. Zhao, P. Wang, R. T. Wang and L. W. Yin, *Advanced Energy Materials*, 2021, **11**, 12.
7. Z. Gao, J. Yang, H. Yuan, H. Fu, Y. Li, Y. Li, T. Ferber, C. Guhl, H. Sun, W. Jaegermann, R. Hausbrand and Y. Huang, *Chem. Mater.*, 2020, **32**, 3970-3979.



8. Z. Zhang, S. Wenzel, Y. Zhu, J. Sann, L. Shen, J. Yang, X. Yao, Y.-S. Hu, C. Wolverton, H. Li, L. Chen and J. Janek, *ACS Applied Energy Materials*, 2020, **3**, 7427-7437.
